# Supplementary material for: Interfacial solvation and slow transport of hydrated excess protons in non-ionic reverse micelles
Source: Royal Society of Chemistry journal article supplement (doi:10.1039/d0cp00378f), 2020-01-01
Supplement: d0cp00378f1.pdf [file d0cp00378f1.pdf]

# Supplementary Information

## for

### Interfacial Solvation and Slow Transport of Hydrated Excess Protons in Non-ionic Reverse Micelles

Zhefu Li and Gregory A. Voth\*

Department of Chemistry, Chicago Center for Theoretical Chemistry, James Franck Institute, and Institute for Biophysical Dynamics, The University of Chicago, 5735 South Ellis Avenue, Chicago, Illinois 60637, United States

#### 1. Simulation Details

The following table (Table S1) shows the parameters for MS-RMD 5. Detailed explanation of the definition of each parameter can be found in ref [1].

**Table S1.** Parameters for MS-RMD 5.

|                                          |               |                           |                              |                |                   |
|------------------------------------------|---------------|---------------------------|------------------------------|----------------|-------------------|
| $D_{\text{OH}}$                          | 79.0864       | kcal/mol                  | $C$                          | 4.8104436742   | kcal/mol          |
| $a_{\text{OH}}$                          | 2.0834        | $\text{\AA}^{-1}$         | $c$                          | 0.8789513630   | $\text{\AA}^{-1}$ |
| $R_{\text{OH}}^0$                        | 0.98          | $\text{\AA}$              | $d_{\text{OH}}^0$            | 1.0            | $\text{\AA}$      |
| $k_a$                                    | 77.4868       | kcal/mol/rad <sup>2</sup> | $V_{\text{const}}^{ij}$      | -26.8448507041 | kcal/mol          |
| $a_0$                                    | 111.7269      | deg                       | $q_{\text{O}}^{\text{ex}}$   | -0.0895456     | $e$               |
| $\epsilon_{\text{O}^*\text{O}^*}$        | 0.098609686   | kcal/mol                  | $q_{\text{H}}^{\text{ex}}$   | 0.0252683      | $e$               |
| $\sigma_{\text{O}^*\text{O}^*}$          | 3.118508      | $\text{\AA}$              | $q_{\text{H}^*}^{\text{ex}}$ | 0.0780180      | $e$               |
| $\epsilon_{\text{H}^*\text{H}^*}$        | 0.000 040 458 | kcal/mol                  | $\gamma$                     | 0.9255057577   | $\text{\AA}^{-2}$ |
| $\sigma_{\text{H}^*\text{H}^*}$          | 0.0           | $\text{\AA}$              | $P$                          | 0.6709512773   |                   |
| $\epsilon_{\text{O}^*\text{H}_\text{W}}$ | 1.5           | $k$                       | $k$                          | 4.3082944586   | $\text{\AA}^{-2}$ |
| $\sigma_{\text{O}^*\text{H}_\text{W}}$   | 1.6           | $\text{\AA}$              | $D_{\text{OO}}$              | 2.7665199244   | $\text{\AA}$      |
| $q_{\text{O}}^{\text{H}_3\text{O}^+}$    | -0.32         | $e$                       | $\beta$                      | 5.5765348350   | $\text{\AA}^{-1}$ |
| $q_{\text{H}}^{\text{H}_3\text{O}^+}$    | 0.44          | $e$                       | $R_{\text{OO}}^0$            | 3.0571843103   | $\text{\AA}$      |
| $B$                                      | 12.8946159531 | kcal/mol                  | $P'$                         | 5.7250801272   | $\text{\AA}^{-1}$ |
| $b$                                      | 0.9652626593  | $\text{\AA}^{-1}$         | $a$                          | 7.2620326328   | $\text{\AA}^{-1}$ |
| $b'$                                     | 2.9007507545  | $\text{\AA}^{-2}$         | $r_{\text{OO}}^0$            | 1.7870085767   | $\text{\AA}$      |

|            |     |   |  |  |  |  |
|------------|-----|---|--|--|--|--|
| $d_{00}^0$ | 2.4 | Å |  |  |  |  |
|------------|-----|---|--|--|--|--|

The following figure (Figure S1) shows the charges generated from *ab initio* calculations by R.E.D. Server for the atoms in the surfactant molecules. The parameters of bonds, angles and dihedrals are from General Amber Force Field (GAFF). Information about GAFF can be found in ref [2].

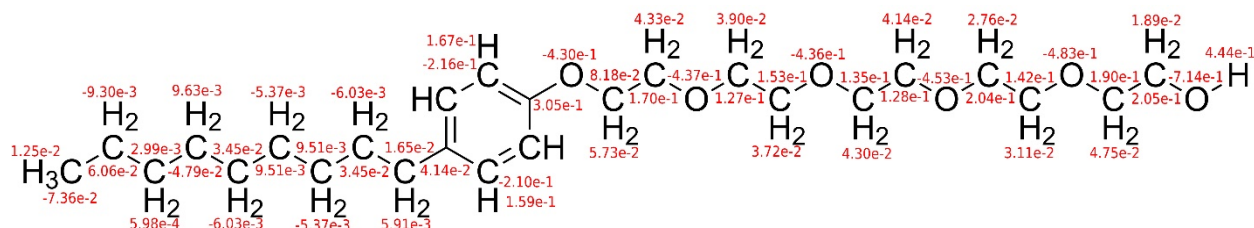

**Figure S1.** Charge of each atom in the surfactant molecule, generated by R.E.D. server.

The following table (Table S2) shows the parameters for aSPC/fw water model used in this research. Detailed explanation of the definition of each parameter can be found in ref [3].

**Table S2.** Parameters for aSPC/fw water model.

|                     |           |                           |
|---------------------|-----------|---------------------------|
| $r_{OH}^{eq}$       | 0.995     | Å                         |
| $D_{OH}$            | 116.09    | kcal/mol                  |
| $\alpha_{OH}$       | 2.287     | Å <sup>-1</sup>           |
| $K_{HOH}$           | 75.9      | kcal/mol/rad <sup>2</sup> |
| $\theta_{HOH}^{eq}$ | 112.5     | deg                       |
| $q_O$               | -0.8350   | <i>e</i>                  |
| $q_H$               | 0.4175    | <i>e</i>                  |
| $\epsilon_{OO}$     | 0.1554253 | kcal/mol                  |
| $\sigma_{OO}$       | 3.165492  | Å                         |

## References:

- [1] Chen, C., Arntsen, C., & Voth, G. A. (2017). Development of reactive force fields using *ab initio* molecular dynamics simulation minimally biased to experimental data. *The Journal of Chemical Physics*, *147*, 161719.
- [2] Wang, J., Wolf, R. M., Caldwell, J. W., Kollman, P. A., & Case, D. A. (2004). Development and testing of a general amber force field. *Journal of Computational Chemistry*, *25*, 1157-1174.
- [3] Wu, Y., Tepper, H. L., & Voth, G. A. (2006). Flexible simple point-charge water model with improved liquid-state properties. *The Journal of Chemical Physics*, *124*, 024503.
